## **Genomic analyses in a large clinical cohort reveal high prevalence of *MECP2* variants associated with neuropsychiatric phenotypes in adulthood**

Claudia Gonzaga-Jauregui<sup>1</sup>, Alina Kurolap<sup>2,3</sup>, Lauren Walsh<sup>4</sup>, Jeffrey Staples<sup>1</sup>, Cristopher Van Hout<sup>1</sup>, Matthew Oetjens<sup>4</sup>, Daren Liu<sup>1</sup>, Regeneron Genetics Center, Rodney Samaco<sup>5,6</sup>, Karin Weiss<sup>2</sup>, Hagit Baris Feldman<sup>2,3,7</sup>, Christa L. Martin<sup>4</sup>

<sup>1</sup> Regeneron Genetics Center, Tarrytown, NY, USA

<sup>2</sup> The Genetics Institute, Rambam Health Care Campus, Haifa, Israel.

<sup>3</sup> The Genetics Institute, Tel Aviv Sourasky Medical Center, Tel Aviv, Israel (current affiliation)

<sup>4</sup> Geisinger, Danville PA, USA

<sup>5</sup> Department of Human and Molecular Genetics, Baylor College of Medicine, Houston, TX, USA

<sup>6</sup> Jan and Dan Duncan Neurological Research Institute, Texas Children's Hospital, Houston, TX, USA

<sup>7</sup> Sackler Faculty of Medicine, Tel Aviv University, Tel Aviv, Israel

This manuscript has been withdrawn as it was submitted without full consent of all the authors.
